# Supplementary material
Source: PubMed Central journal article supplement (PMC2913199)
Supplement: mmc1.pdf [file mmc1.pdf]

Biophysical Journal, Volume 99

**Supporting Material**

**Casein Kinase 2 beta subunit is a Regulator of Bone Morphogenetic Protein 2 Signaling**

Beth Bragdon, Shayamala Thinakaran, Oleksandra Moseychuk, Daniel King, Jeremy Bonor, Kira Young, David W. Litchfield, Nils O Petersen, and Anja Nohe

Supplementary

S1

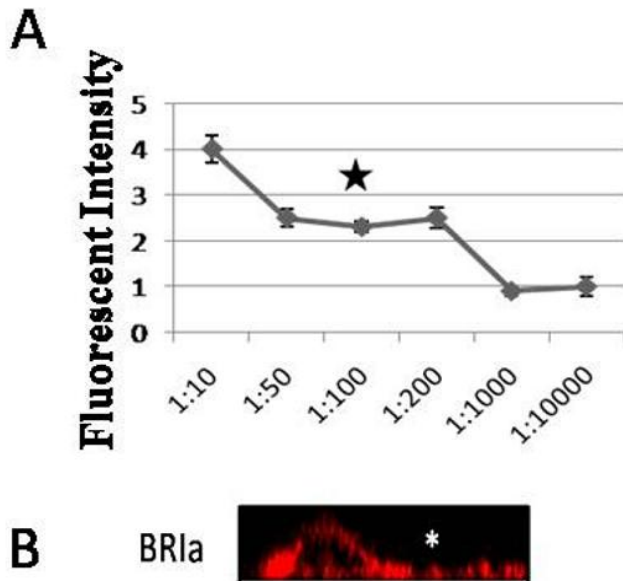

**Figure 1 Immunofluorescence dual labeling controls. (A)** Cells were labeled for BRIa at various antibody concentrations. Fluorescence was measured with confocal microscopy. The concentration that labeled proteins effectively without unspecific binding was used (marked with a star). This is also representative of the other antibodies. **(B)** A representative z line image of co-labeled cells for BRIa and CK2 beta subunit. Images for ICS and FRET were taken at flat membrane regions indicated by star.

S2

BRIa

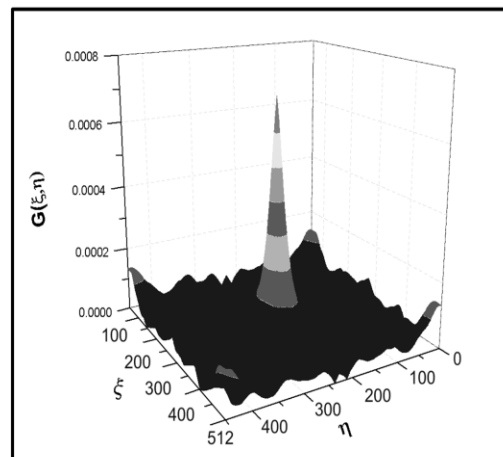

Figure S2. The autocorrelation function of BRIa for ICS.
